# Supplementary material for: Five M(ii) coordination polymers assembled from various polynuclear units spaced by semirigid carboxyphenylpropionate and N-donor coligand
Source: Royal Society of Chemistry journal article supplement (doi:10.1039/c1ce05926b), 2011-11-25
Supplement: c1ce05926b.pdf [file c1ce05926b.pdf]

## Supplementary information

### Five M(II) Coordination Polymers Assembled from Various Polynuclear Units Spaced by Semirigid Carboxyphenylpropionate and N-donor Coligand

Guang-Zhen Liu, Shi-Hui Li and Li-Ya Wang\*

*College of Chemistry and Chemical Engineering, Luoyang Normal University, Luoyang 471022, P. R. China*

\*Corresponding authors. Fax: +86-379-65511205; Tel: +86-0379-65523593; E-mail: [wlya@lynu.edu.cn](mailto:wlya@lynu.edu.cn)

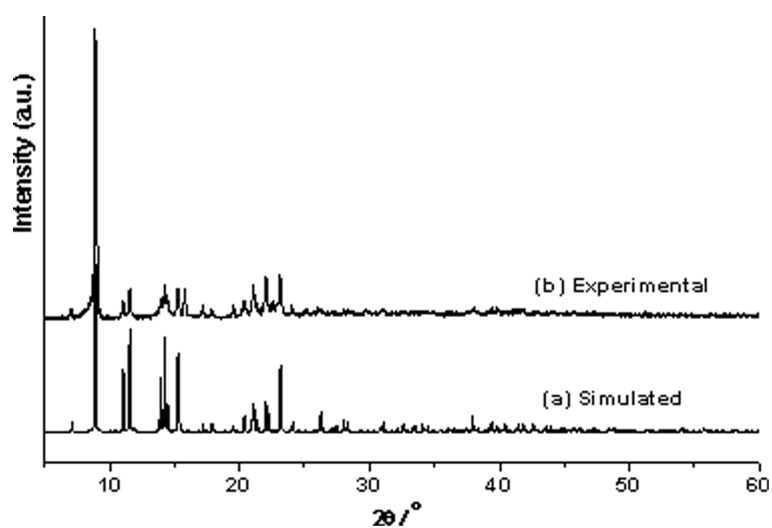

Fig. S1 The experimental and simulated PXRD patterns for complex 1.

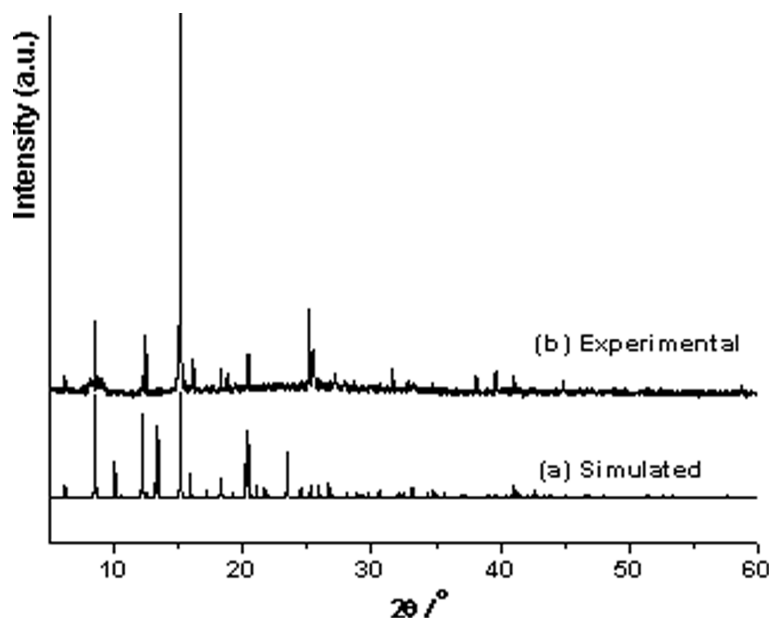

Fig. S2 The experimental and simulated PXRD patterns for complex 2.

\*To whom correspondence should be addressed. E-mail: [wlya@lynu.edu.cn](mailto:wlya@lynu.edu.cn).

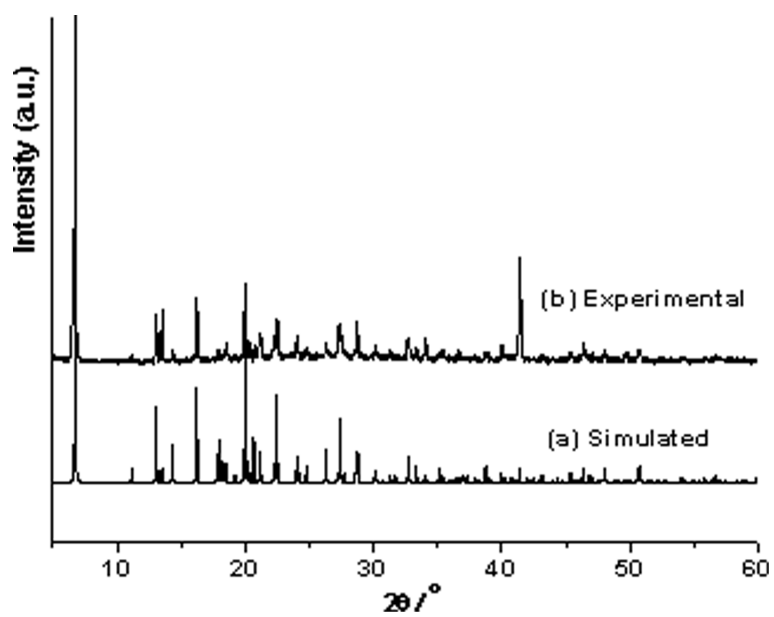

Fig. S3 The experimental and simulated PXR D patterns for complex 3.

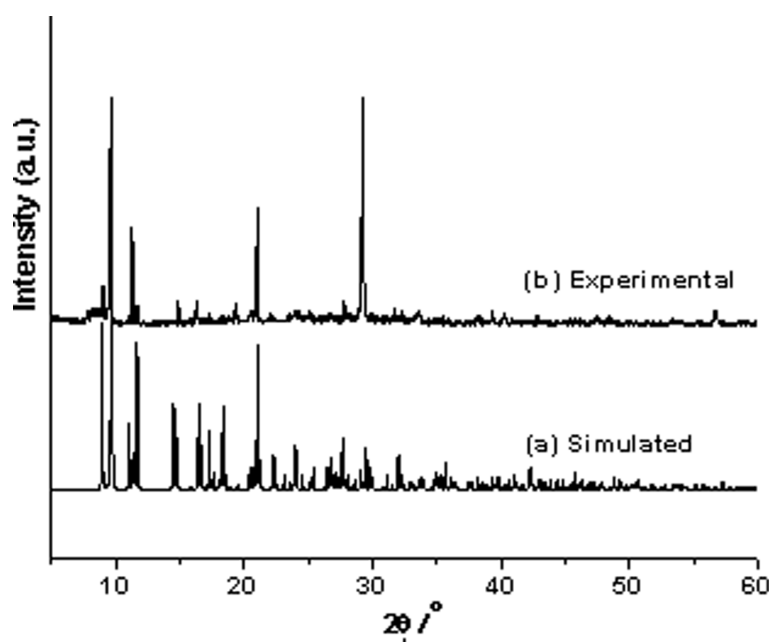

Fig. S4 The experimental and simulated PXR D patterns for complex 4.

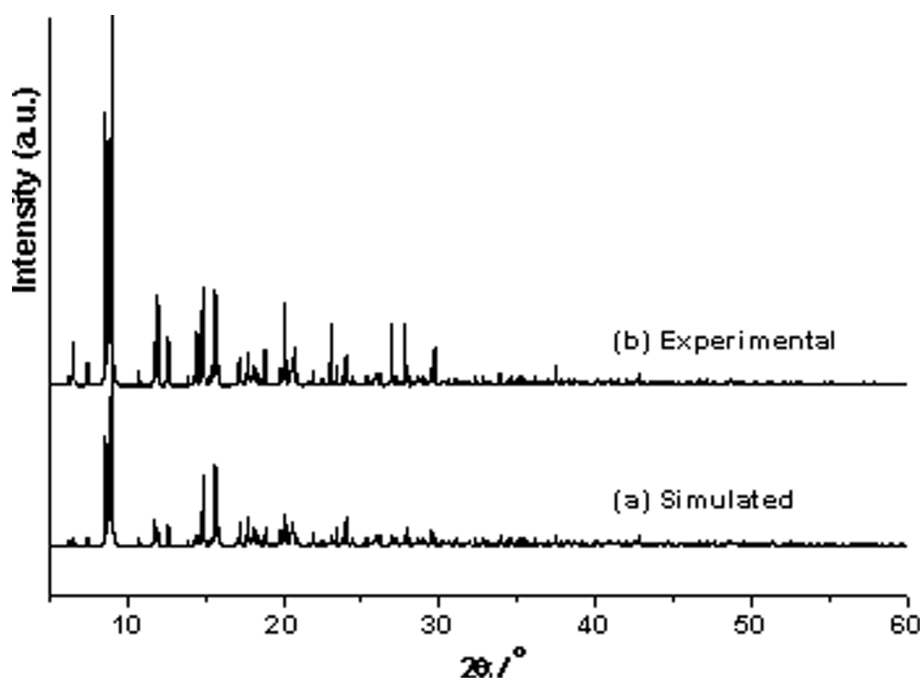

Fig. S5 The experimental and simulated PXR D patterns for complex 5.

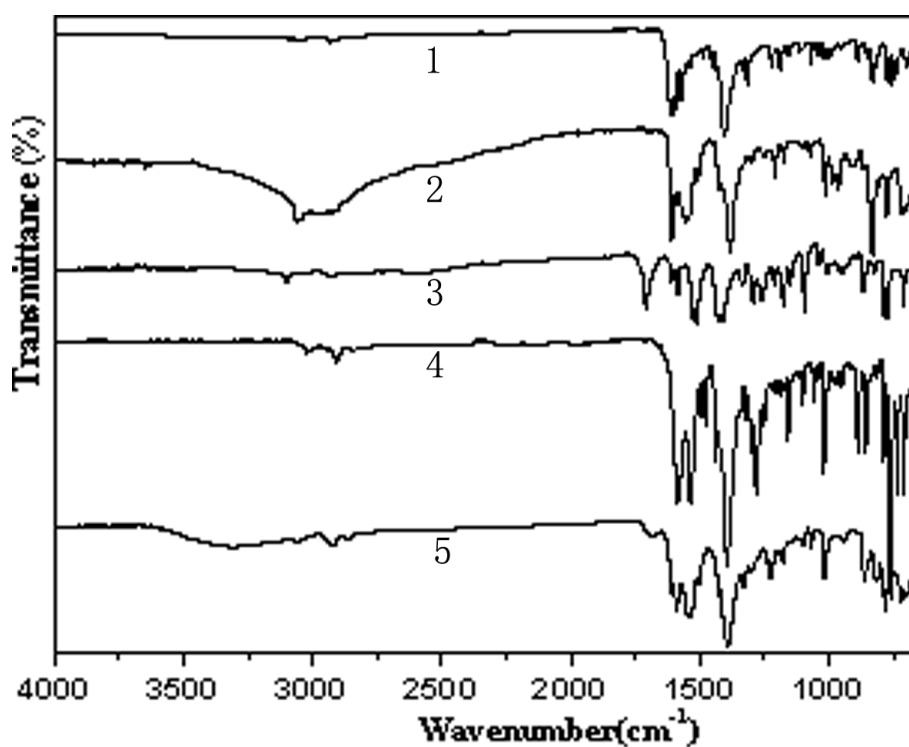

Fig. S6 IR spectra of complexes 1-5.
